# Supplementary material
Source: PubMed Central journal article supplement (PMC10099087)
Supplement: jamapsychiatry-e230596-s001.pdf [file jamapsychiatry-e230596-s001.pdf]

## Data Sharing Statement

Olfson. Living Alone and Drug Overdose Deaths in the US. *JAMA Psychiatry*. Published April 12, 2023. doi:10.1001/jamapsychiatry.2023.0596

### Data

**Data available:** Yes

**Data types:** Deidentified participant data

**How to access data:** <https://www.census.gov/topics/research/mdac.html>

**When available:** beginning date: 03-01-2022

### Supporting Documents

**Document types:** None

### Additional Information

**Who can access the data:** Researchers whose proposed use of the data has been approved by the US Census Bureau

**Types of analyses:** To provide an analytical research database to study the effect of demographic and socio-economic differentials on U.S. mortality rates.

**Mechanisms of data availability:** Research access to the entire MDAC database is arranged through the Principal Investigators of the MDAC sponsoring agencies. Researchers complete and submit a research proposal to the Principal Investigator of an MDAC sponsoring agency.

**Any additional restrictions:** Only results that have been reviewed and approved by the US Census Bureau's Disclosure Review Board may be provided outside of approved data users.
